# Supplementary material for: Capture at the ER-mitochondrial contacts licenses IP3 receptors to stimulate local Ca2+ transfer and oxidative metabolism
Source: PubMed Central journal article supplement (PMC9646835; doi:10.1038/s41467-022-34365-8), 2022-11-09
Supplement: 41467_2022_34365_MOESM1_ESM.pdf [file 41467_2022_34365_MOESM1_ESM.pdf]

**Capture at the ER-Mitochondrial Contacts Licenses IP<sub>3</sub> receptors to Stimulate  
Local Ca<sup>2+</sup> Transfer and Oxidative Metabolism**

**Katona et al.**

Fig. S1

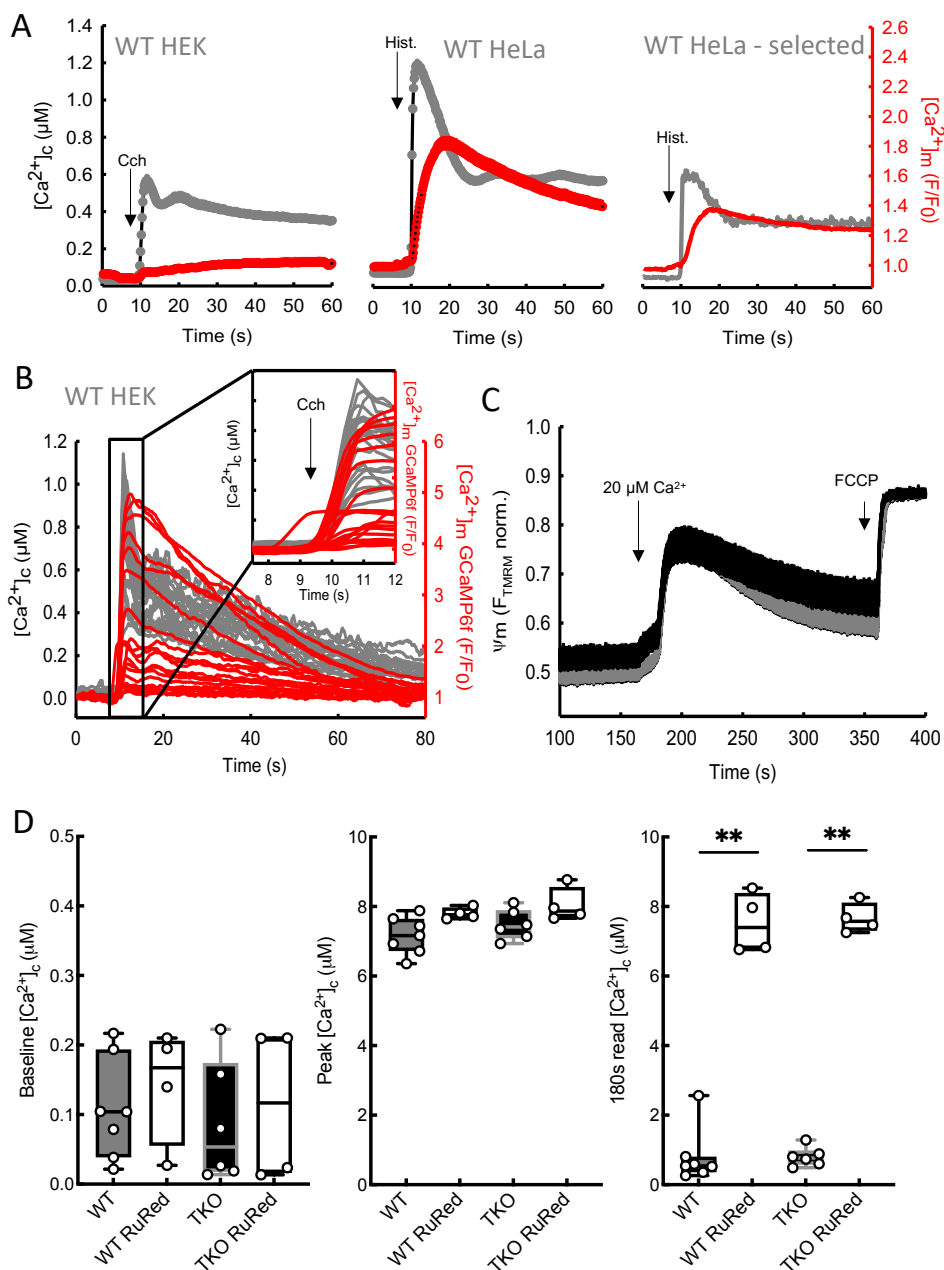

**Fig. S1 WT HEK cells showed weak ER-mitochondrial  $Ca^{2+}$  coupling, but similar mitochondrial  $Ca^{2+}$  uptake to IP3R deficient cells**

(A) Average time courses showing agonist-induced (Carbachol or Histamine)  $[Ca^{2+}]_c$  and  $[Ca^{2+}]_m$  changes in WT HEK (left), WT HeLa (middle) and selected WT HeLa to match WT HEK responses (right). (Datapoints represent averages with  $\pm$ S.E.M.) (B) Representative traces showing Cch-induced changes in  $[Ca^{2+}]_c$  (gray) and corresponding changes in matrix targeted GCaMP6f (red) fluorescence with kinetics similar to the  $[Ca^{2+}]_c$  response in HEK cells, suggesting cytosolic localization of GCaMP6f (n=21). (C) Time courses of TMRM fluorescence in suspensions of permeabilized WT (gray) and TKO HEK (black) cells presenting changes in  $\Delta\Psi_m$  after  $Ca^{2+}$  pulse and FCCP. (Datapoints represent averages with  $\pm$ S.E.M.) (D) Box plots showing the baseline  $[Ca^{2+}]_c$ , peak  $[Ca^{2+}]_c$  and  $[Ca^{2+}]_c$  after 180s with (WT – dark gray, TKO – black) and without (empty) RuRed pretreatment (WT, TKO n=7, WT+RuRed, TKO+RuRed n=4; \*\* < 0.001, One-way ANOVA, Holm-Sidak method, box plots indicate median, 25th and 75th percentile (box), and 5th and 95th percentile (whiskers) and all datapoints). Source data are provided for each panel Source Data file.

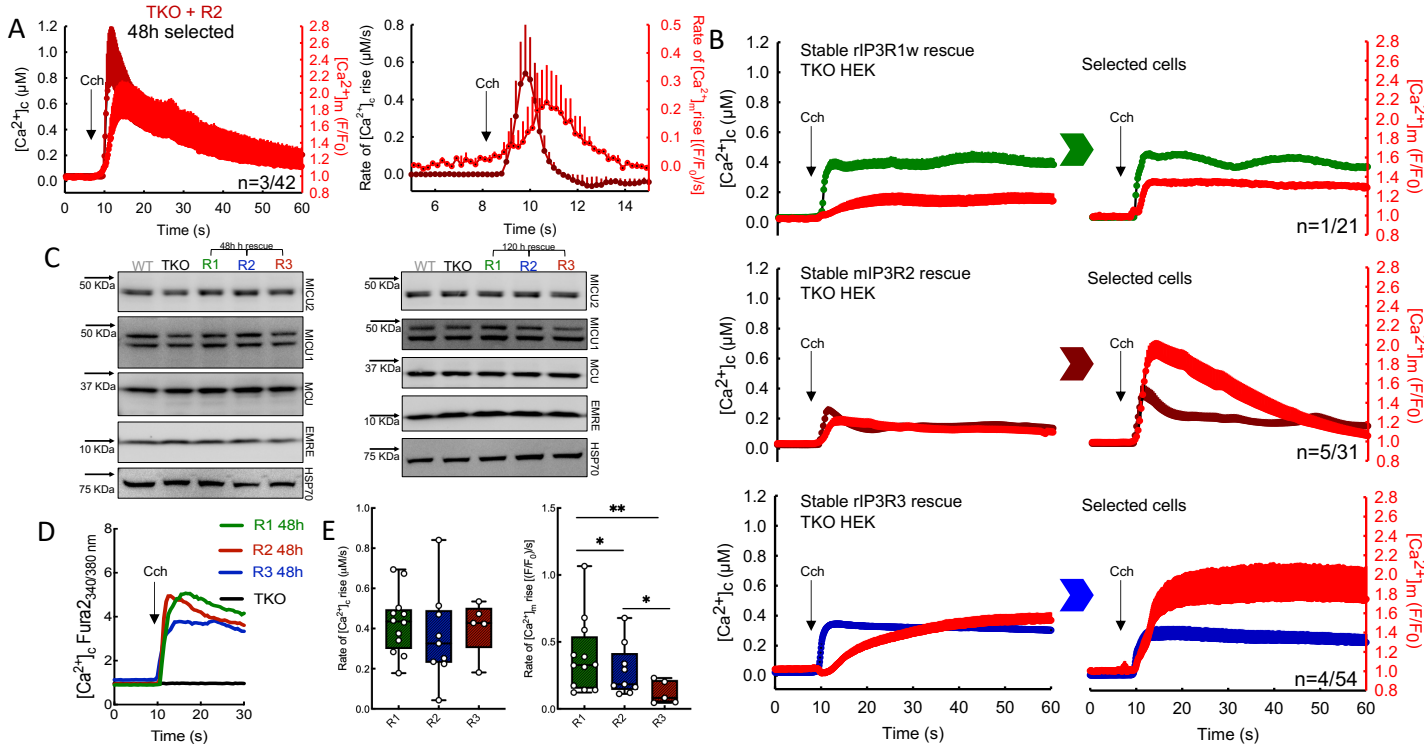

**Fig. S2 Long term overexpression of IP3Rs did not alter the expression of the mitochondrial  $Ca^{2+}$  uniporter complex, while promoted ER-mitochondrial  $Ca^{2+}$  communication**

(A) Average time courses of the changes in  $[Ca^{2+}]_c$  (maroon) and  $[Ca^{2+}]_m$  (red) in selected 48 h R2 acute rescue cells with less than 3s cyto-mito coupling time (left). Mean traces of the rate of  $Ca^{2+}$  rise in the cytosol and the mitochondrial matrix of the selected cells (right). (Datapoints represent averages with  $\pm$ S.E.M.) (B) Average traces of the  $[Ca^{2+}]_c$  and  $[Ca^{2+}]_m$  agonist responses in all cells (left) and a selected subpopulation of well coupled IP3R stable rescue cells (right). (Datapoints represent averages with  $\pm$ S.E.M.) (C) Immunoblots showing the protein levels of MCU, MICU1, MICU2 and EMRE in WT, TKO HEK and IP3R1-3 acute 48h (left) and 120h (right) rescue TKO HEK lysates. (D) Average  $[Ca^{2+}]_c$  time courses confirming IP3R-rescue in cells processed for immunoblots in panel C. (E) Calculated maximum rates of  $[Ca^{2+}]_c$  and  $[Ca^{2+}]_m$  change in selected cells for each 120 h IP3R rescue condition. (\*  $p < 0.05$ , \*\*  $p < 0.001$ , One-way ANOVA, Normality Test (Shapiro-Wilk), All Pairwise Multiple Comparison Procedures (Holm-Sidak method), box plots indicate median, 25th and 75th percentile (box), and 5th and 95th percentile (whiskers) and all datapoints. Source data are provided for each panel as a Source Data file.

FigS3

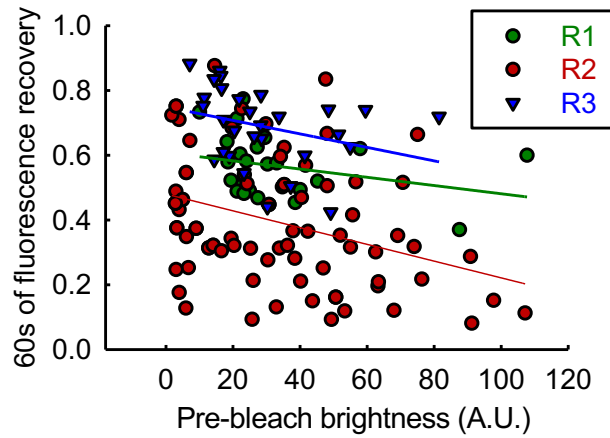

**Fig. S3 Pre-bleach brightness had no effect on fluorescence recovery**

Extent of fluorescence recovery after photobleaching by IP3R isoform plotted as a function of the pre-bleach brightness under identical imaging conditions (IP3R1 – green, IP3R2 – red, IP3R3 – blue). Source data are provided as a Source Data file.

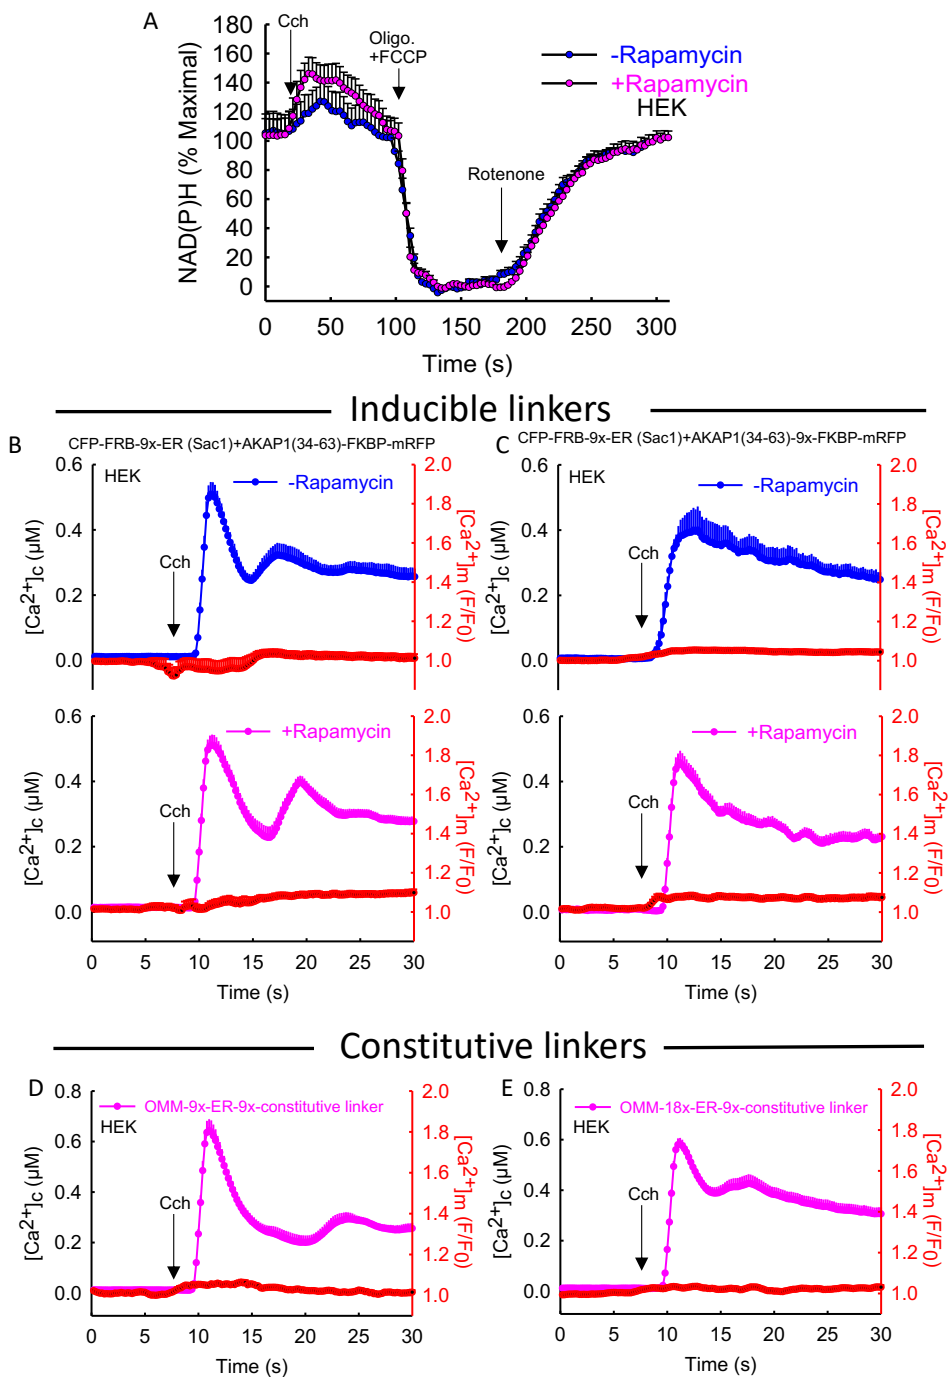

**Fig. S4 IP3R3 localization to the ERMCS by linkage promoted oxidative metabolism, while increasing ERMCS by linkers had no effect on ER-mitochondrial Ca<sup>2+</sup> transfer in WT HEK**

(A) Average time courses showing agonist (Cch) induced changes in NAD(P)H autofluorescence with and without trapping R3 at the ERMCS by rapamycin-induced linkage (n=21). (B-C) Average Cch induced [Ca<sup>2+</sup>]<sub>c</sub> and corresponding [Ca<sup>2+</sup>]<sub>m</sub> responses in WT HEK cells expressing rapamycin inducible (B) SHORT (1x helix; -Rapa n=11, +Rapa n=17) or (C) LONG (9x helix; -Rapa n=10, +Rapa n=12) ER-FRB and OMM-FKBP linker pair without (blue) and with (pink) rapamycin treatment. (D-E) Average [Ca<sup>2+</sup>]<sub>c</sub> and [Ca<sup>2+</sup>]<sub>m</sub> responses in WT HEK cells expressing constitutive (D) LONG (18x helix, n=10) or (E) EXTRA LONG (27x helix, n=14) ER-OMM linker pair expressing cells. (Datapoints represent averages with ±S.E.M. in all graphs.) Source data are provided for each panel as a Source Data file.
